# Supplementary material for: An Integrated Approach between Multispectral Satellite Images and Geophysical and Morpho-Topographic Surveys for the Detection of Water Stress Associated with Coastal Dune Erosion
Source: MDPI journal article supplement (doi:10.3390/rs15184415), 2023-09-07
Supplement: s1 [file s1]

## Supplementary Materials

**Table S1.** Dataset of multispectral images used for the assessment of water stress.

| Year | Date       | Sensors                    | Cloud cover percentage |
|------|------------|----------------------------|------------------------|
| 2019 |            |                            |                        |
|      | 2/13/2019  | Landsat 8-9 OLI/TIRS C2 L1 | 31.74                  |
|      | 3/26/2019  | Landsat 8-9 OLI/TIRS C2 L1 | 13.68                  |
|      | 4/18/2019  | Landsat 8-9 OLI/TIRS C2 L1 | 0.63                   |
|      | 6/5/2019   | Landsat 8-9 OLI/TIRS C2 L1 | 5.66                   |
|      | 6/21/2019  | Landsat 8-9 OLI/TIRS C2 L1 | 1.78                   |
|      | 7/7/2019   | Landsat 8-9 OLI/TIRS C2 L1 | 1.0                    |
|      | 8/1/2019   | Landsat 8-9 OLI/TIRS C2 L1 | 0.0                    |
|      | 9/25/2019  | Landsat 8-9 OLI/TIRS C2 L1 | 0.0                    |
|      | 10/20/2019 | Landsat 8-9 OLI/TIRS C2 L1 | 12.88                  |
|      | 10/27/2019 | Sentinel-2B                | 0.013                  |
|      | 12/7/2019  | Landsat 8-9 OLI/TIRS C2 L1 | 4.60                   |
|      | 12/31/2019 | Sentinel-2A                | 1.33                   |
| 2020 | 1/24/2020  | Landsat 8-9 OLI/TIRS C2 L1 | 7.99                   |
|      | 2/9/2020   | Sentinel-2A                | 0.21                   |
|      | 3/12/2020  | Landsat 8-9 OLI/TIRS C2 L1 | 0.08                   |
|      | 4/29/2020  | Landsat 8-9 OLI/TIRS C2 L1 | 43.76                  |
|      | 5/24/2020  | Sentinel-2B                | 0.15                   |
|      | 6/13/2020  | Sentinel-2B                | 0.37                   |
|      | 6/18/2023  | Sentinel-2B                | 10.81                  |
|      | 6/28/2020  | Sentinel-2A                | 0.87                   |
|      | 7/9/2020   | Landsat 8-9 OLI/TIRS C2 L1 | 5.01                   |
|      | 7/28/2020  | Sentinel-2A                | 0.16                   |
|      | 8/10/2020  | Landsat 8-9 OLI/TIRS C2 L1 | 0.89                   |
|      | 9/11/2020  | Landsat 8-9 OLI/TIRS C2 L1 | 5.82                   |
|      | 10/22/2020 | Landsat 8-9 OLI/TIRS C2 L1 | 0.39                   |
|      | 11/7/2020  | Landsat 8-9 OLI/TIRS C2 L1 | 2.93                   |
|      | 11/30/2020 | Landsat 8-9 OLI/TIRS C2 L1 | 40.61                  |
| 2021 | 1/1/2021   | Landsat 8-9 OLI/TIRS C2 L1 | 23.12                  |
|      | 2/18/2021  | Landsat 8-9 OLI/TIRS C2 L1 | 28.76                  |
|      | 3/15/2021  | Landsat 8-9 OLI/TIRS C2 L1 | 61.48                  |
|      | 3/31/2021  | Landsat 8-9 OLI/TIRS C2 L1 | 0.60                   |
|      | 5/18/2021  | Landsat 8-9 OLI/TIRS C2 L1 | 0.08                   |
|      | 6/3/2021   | Landsat 8-9 OLI/TIRS C2 L1 | 0.19                   |
|      | 7/21/2021  | Landsat 8-9 OLI/TIRS C2 L1 | 0.56                   |
|      | 8/22/2021  | Landsat 8-9 OLI/TIRS C2 L1 | 0.24                   |
|      | 9/14/2021  | Landsat 8-9 OLI/TIRS C2 L1 | 3.75                   |
|      | 10/16/2021 | Landsat 8-9 OLI/TIRS C2 L1 | 49.26                  |
|      | 11/17/2021 | Landsat 8-9 OLI/TIRS C2 L1 | 33.05                  |

|             |            |                            |       |
|-------------|------------|----------------------------|-------|
|             | 11/25/2021 | Sentinel-2B                | 49.64 |
|             | 12/20/2021 | Landsat 8-9 OLI/TIRS C2 L1 | 15.15 |
|             | 12/30/2021 | Sentinel-2A                | 0.60  |
| <b>2022</b> | 1/20/2022  | Landsat 8-9 OLI/TIRS C2 L1 | 36.68 |
|             | 2/21/2022  | Landsat 8-9 OLI/TIRS C2 L1 | 25.79 |
|             | 3/25/2022  | Landsat 8-9 OLI/TIRS C2 L1 | 0.53  |
|             | 4/19/2022  | Landsat 8-9 OLI/TIRS C2 L1 | 4.91  |
|             | 5/20/2022  | Landsat 8-9 OLI/TIRS C2 L1 | 2.83  |
|             | 6/30/2022  | Landsat 8-9 OLI/TIRS C2 L1 | 6.01  |
|             | 7/15/2022  | Landsat 8-9 OLI/TIRS C2 L1 | 0.42  |
|             | 8/16/2022  | Landsat 8-9 OLI/TIRS C2 L1 | 20.78 |
|             | 9/10/2022  | Landsat 8-9 OLI/TIRS C2 L1 | 2.08  |
|             | 10/3/2022  | Landsat 8-9 OLI/TIRS C2 L1 | 28.75 |
|             | 11/21/2022 | Landsat 8-9 OLI/TIRS C2 L1 | 7.10  |
|             | 12/31/2022 | Landsat 8-9 OLI/TIRS C2 L1 | 1.11  |
| <b>2023</b> | 1/4/2023   | Sentinel-2A                | 22.5  |
|             | 2/18/2023  | Sentinel-2B                | 0.36  |
|             | 4/29/2023  | Sentinel-2A                | 27.19 |
|             | 5/24/2023  | Sentinel-2A                | 1.29  |
|             | 6/18/2023  | Sentinel-2B                | 1.55  |
